# Supplementary material for: Promoting hydrogen absorption of liquid organic hydrogen carriers by solid metal hydrides
Source: Royal Society of Chemistry journal article supplement (doi:10.1039/c9ta05966k), 2019-01-01
Supplement: c9ta05966k1.pdf [file c9ta05966k1.pdf]

## Promoting Hydrogen Absorption of Liquid Organic Hydrogen Carriers by Solid Metal Hydrides

Yong Wu, Hongen Yu, Yanru Guo, Yuxuan Zhang, Xiaojing Jiang, Bingxue Sun, Kai Fu, Jun Chen, Yue Qi, Jie Zheng\*, and Xingguo Li \*

### Experimental Section

#### Preparation of catalysts:

$\text{YH}_3$  was synthesized by directly hydrogenation of Y at 350 °C under 4 MPa  $\text{H}_2$  pressure for 6 h.  $\text{LaH}_3$ ,  $\text{GdH}_3$  and  $\text{YD}_3$  was synthesized with the similar method.  $\text{YH}_3$  was ball-milled to powder in 4 bar  $\text{H}_2$  atmosphere with rotating speed of 250 rpm and ball to powder mass ratio 6:1 for 10 h.

Preparation of  $\text{Ni}(500\text{ nm})/\text{Al}_2\text{O}_3$  with 5 wt% Ni loading. 1.0 g  $\gamma\text{-Al}_2\text{O}_3$  and 110.8 mg  $\text{NiCl}_2$  were mixed in 20 mL anhydrous THF by stirring overnight. After distilling the solvent by vacuum, the  $\text{NiCl}_2/\text{Al}_2\text{O}_3$  was vacuumed for 2 h at 120 °C in a closed tube furnace, heated to 450 °C. After an hour, it was reduced by 4 MPa  $\text{H}_2$  for 2 h. Then it was vacuumed and cooled to 320 °C. After that, the furnace was filled with 4 MPa  $\text{H}_2$  again and heated at 320 °C overnight.  $\text{Ni}/\text{Al}_2\text{O}_3$  in the article represents  $\text{Ni}(500\text{ nm})/\text{Al}_2\text{O}_3$  without extra explanation.

Preparation of  $\text{Ni}(10\text{ nm})/\text{Al}_2\text{O}_3$  with 5 wt% Ni loading. 1.0 g  $\gamma\text{-Al}_2\text{O}_3$  and 248 mg  $\text{Ni}(\text{NO}_3)_2 \cdot 6\text{H}_2\text{O}$  were mixed in 10 mL  $\text{H}_2\text{O}$  by stirring at room temperature overnight. After removing water by freeze drying, the  $\text{Ni}(\text{NO}_3)_2/\text{Al}_2\text{O}_3$  was heated in a tube furnace in an Ar flow of 50 sccm (standard cubic centimeter per minute) using the following program: 2 °C  $\text{min}^{-1}$  to 120 °C, maintaining at 120 °C for 3 h, then 6 °C  $\text{min}^{-1}$  to 500 °C and maintaining at 500 °C for 4 h. The above procedure is to convert  $\text{Ni}(\text{NO}_3)_2$  to NiO. Then,  $\text{H}_2$  flow of 20 sccm is added and the temperature is raised to 550 °C at 5 °C  $\text{min}^{-1}$ , maintained at 550 °C for 1 h and cooled down to room temperature to obtain metallic Ni.

Preparation of  $\text{Ru}/\text{Al}_2\text{O}_3$  with 5 wt% Ru loading. 500 mg  $\gamma\text{-Al}_2\text{O}_3$  and 52.8 mg  $\text{Ru}_3(\text{CO})_{12}$  powder were mixed by gentle hand milling for 5 min. The mixture was then heated in a tube furnace in pure Ar flow of 50 sccm according to the following program: 0.8 °C  $\text{min}^{-1}$  from room temperature to 120 °C, maintained at 120 °C for 1 h, 0.8 °C  $\text{min}^{-1}$  to 250 °C, maintained at 250 °C for 2 h and cooled to room temperature.

The  $\text{Ni}/\text{Al}_2\text{O}_3\text{-YH}_3$  catalyst was obtained by milling 250 mg  $\text{Ni}/\text{Al}_2\text{O}_3$  and 1000 mg  $\text{YH}_3$  with a mortar and pestle for about 5 min in an Ar filled glovebox. Other  $\text{Ni}/\text{Al}_2\text{O}_3\text{-MH}$  or  $\text{Ru}/\text{Al}_2\text{O}_3\text{-MH}$  catalysts were obtained with the similar method.

All metal and metal hydrides contained samples are operated and stored in an inert environment for preventing oxidation.

#### Characterizations:

The catalysts were characterized by Powder X-ray diffraction (XRD, PANalytical X'Pert<sup>3</sup> Powder, Cu K $\alpha$ ), X-ray photoelectron spectroscopy (XPS), temperature programmed desorption/mass spectrometry analysis (TPD/MS, Quantachrome Autosorb iQ automatic gas sorption analyzer), scanning electron microscope (JSM-IT300) and field emission high resolution transmission electron microscope (HRTEM, JEM-2100F).

#### Measurement of the hydrogen absorption performance:

Hydrogen absorption of *N*-ethylcarbazole was measured using the Sievert's method for hydrogen storage materials in a SLM microform high-pressure autoclave (150 mL, Beijing Century Senlong experimental apparatus Co., Ltd.). In each experiment, NEC (1.0 g) and the catalyst (25 mg  $\text{Ni}/\text{Al}_2\text{O}_3$  or  $\text{Ru}/\text{Al}_2\text{O}_3$  with or without 100 mg metal hydrides) are sealed into the autoclave in an argon-filled glove box. No solvent is used to maintain the gravimetric hydrogen storage capacity. No effective stirring can be employed as the reactants just cover the bottom of the autoclave. As a result, no stirring bar is used. The reactor is then connected to the high pressure hydrogen line, evacuated and then heated to the designated temperature in vacuum. After reaching the designated temperature, the autoclave is filled with hydrogen to the designated pressure and then disconnected with the high pressure hydrogen line to initiate hydrogen absorption. The void space of the sealed system is previously calibrated so that the amount of hydrogen absorbed can be calculated by the change of pressure in the system. Usually, the reaction is stopped when the pressure remains unchanged over 2 h. The pressure change is around 0.6 MPa when full hydrogenation of NEC is accomplished. The liquid products are characterized by nuclear magnetic resonance (NMR, Bruker-400 M, ARX400) and Fourier transform infrared spectroscopy (FT-IR, Bruker, Tensor 27). In the isotope labelling experiment, the gas in the autoclave after hydrogen absorption was slowly released through a needle valve and guided into a residual gas analyzer (Pfeiffer Omnistar). The solid catalyst is separated by centrifugation, washed by ethanol and then subjected to a temperature programmed desorption measurement in Ar flow with a heating rate of 10 °C  $\text{min}^{-1}$  from room temperature to 800 °C in an automatic gas sorption analyzer (Quantachrome Autosorb iQ) equipped with a mass spectrometer. The hydrogen absorption of other organic substrates was employed by the same method.

## Supplementary Figures

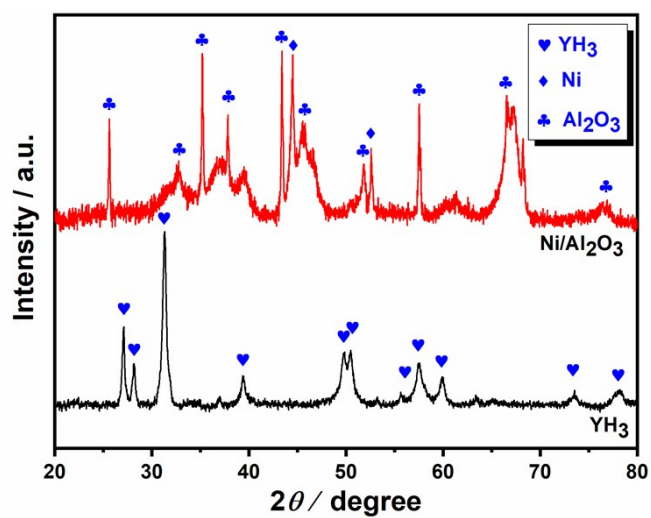

Fig. S1 XRD patterns of  $\text{Ni}/\text{Al}_2\text{O}_3$  and  $\text{YH}_3$ .

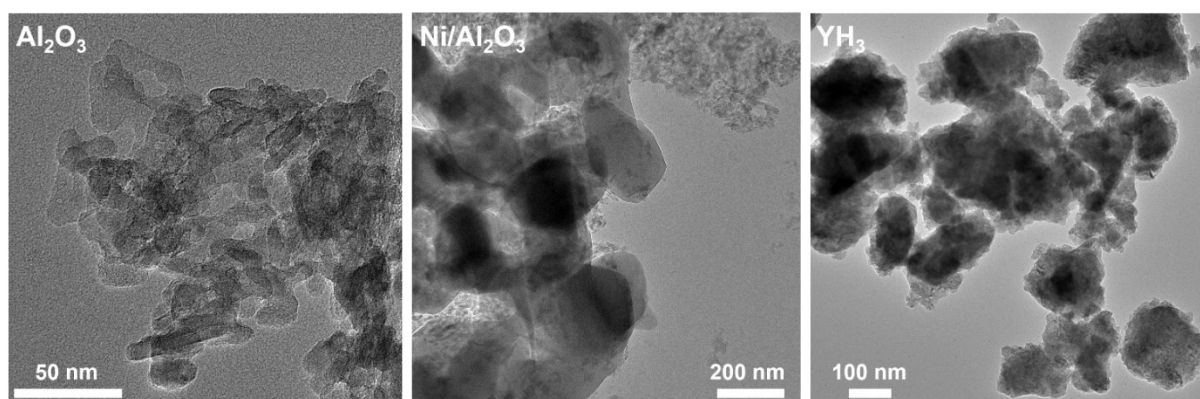

Fig. S2 TEM images of  $\text{Al}_2\text{O}_3$ ,  $\text{Ni}/\text{Al}_2\text{O}_3$  and  $\text{YH}_3$ .

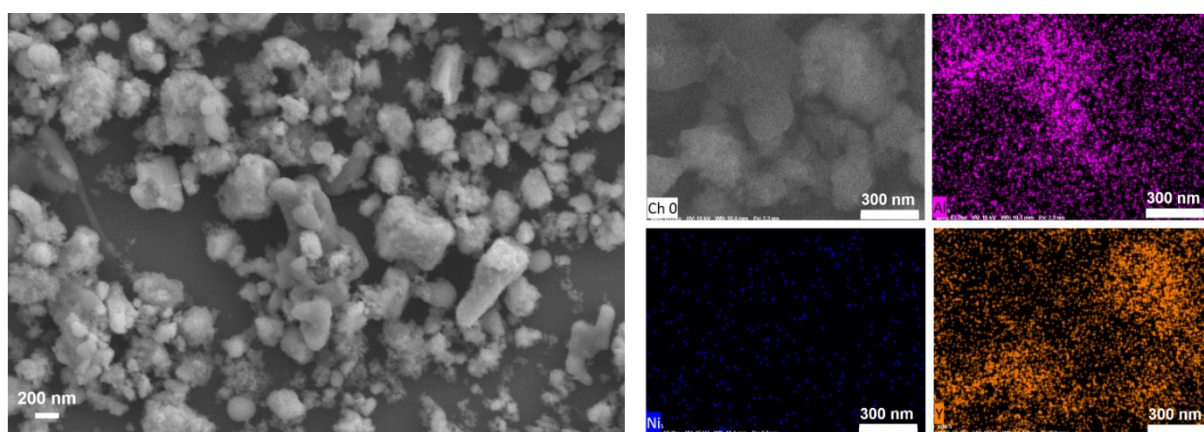

Fig. S3 SEM images and EDX element mappings of  $\text{Ni}/\text{Al}_2\text{O}_3\text{-YH}_3$ .

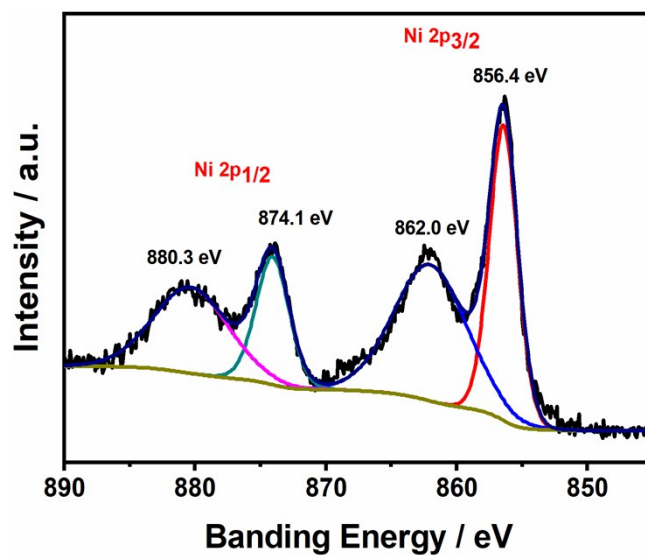

Fig. S4 XPS spectra of Ni/Al<sub>2</sub>O<sub>3</sub>.

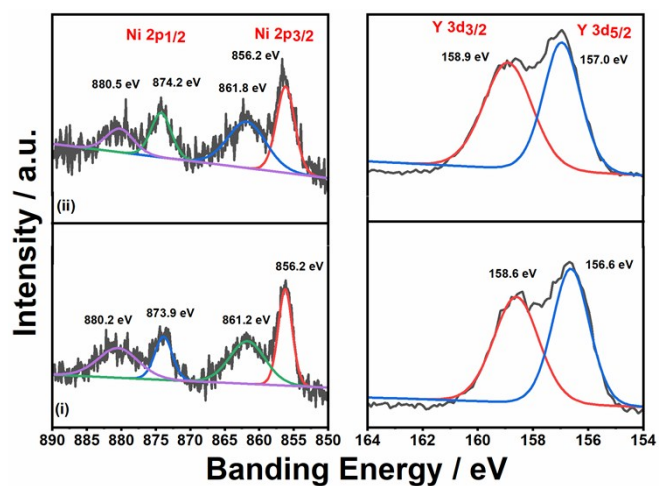

Fig. S5 XPS spectra of Ni/Al<sub>2</sub>O<sub>3</sub>-YH<sub>3</sub> before (i) and after (ii) catalytic hydrogenation.

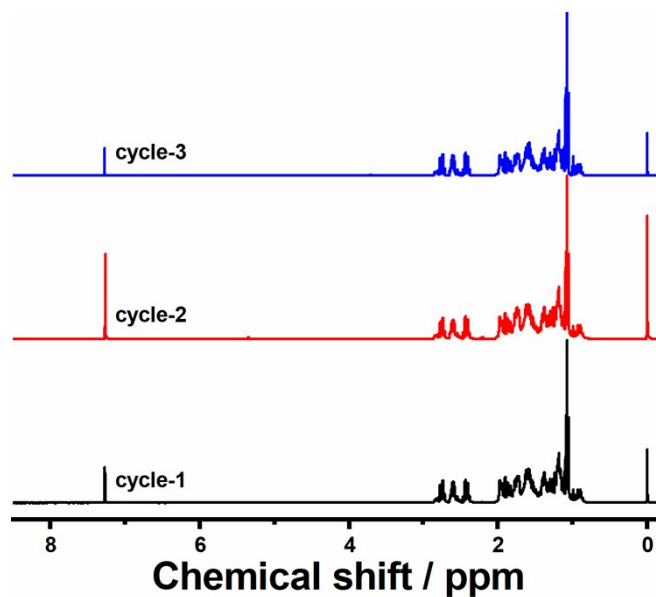

Fig. S6 <sup>1</sup>H NMR spectra of the hydrogenated products (in CDCl<sub>3</sub>) on Ni/Al<sub>2</sub>O<sub>3</sub>-YH<sub>3</sub> for three repeated cycles (180 °C, 10 MPa H<sub>2</sub>, 1.00 g NEC, 125 mg catalyst).

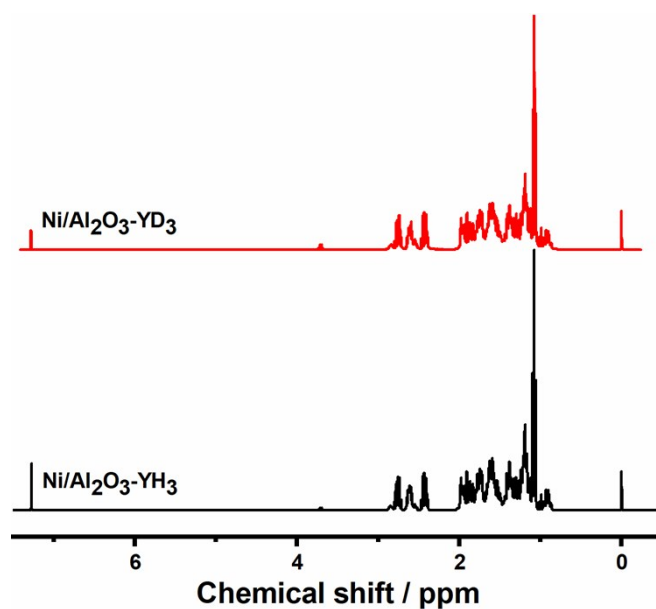

**Fig. S7**  $^1\text{H}$  NMR spectra of the hydrogenated products (in  $\text{CDCl}_3$ ) on  $\text{Ni/Al}_2\text{O}_3\text{-YH}_3$  and  $\text{Ni/Al}_2\text{O}_3\text{-YD}_3$  ( $150^\circ\text{C}$ , 3 MPa  $\text{H}_2$ , 1.00 g NEC, 125 mg catalyst).

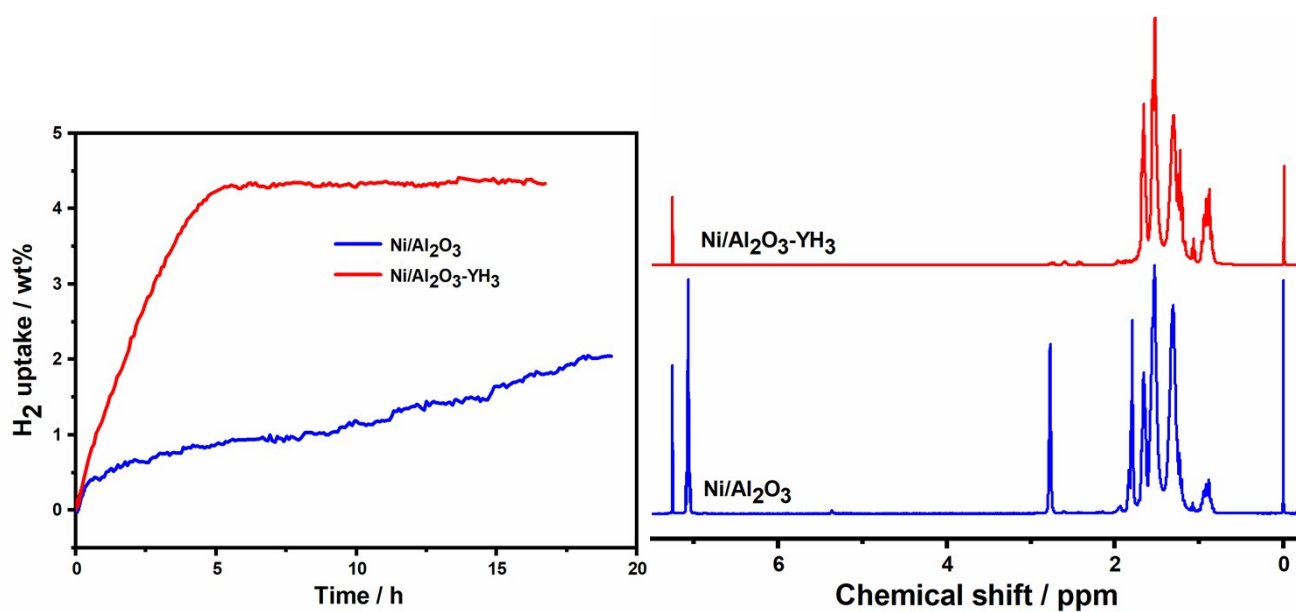

**Fig. S8** Hydrogen absorption kinetics (left) and  $^1\text{H}$  NMR spectra of the hydrogenated products (in  $\text{CDCl}_3$ ) (right) on  $\text{Ni/Al}_2\text{O}_3$  and  $\text{Ni/Al}_2\text{O}_3\text{-YH}_3$  catalysts for hydrogenation of tetrahydronaphthalene ( $150^\circ\text{C}$ , 10 MPa  $\text{H}_2$ , 1.00 g tetrahydronaphthalene).

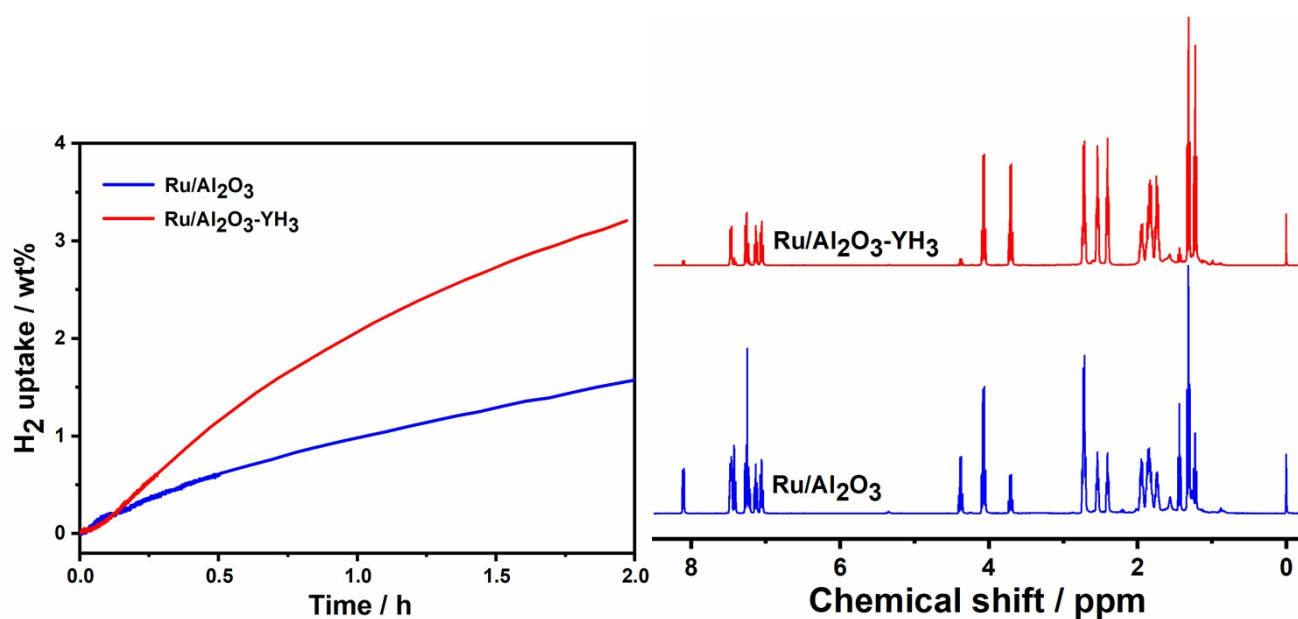

**Fig. S9** Hydrogen absorption kinetics (left) and <sup>1</sup>H NMR spectra of the hydrogenated products (in CDCl<sub>3</sub>) (right) on Ru/Al<sub>2</sub>O<sub>3</sub> and Ru/Al<sub>2</sub>O<sub>3</sub>-YH<sub>3</sub> catalysts (150 °C, 1.3 MPa H<sub>2</sub>, 1.00 g NEC).

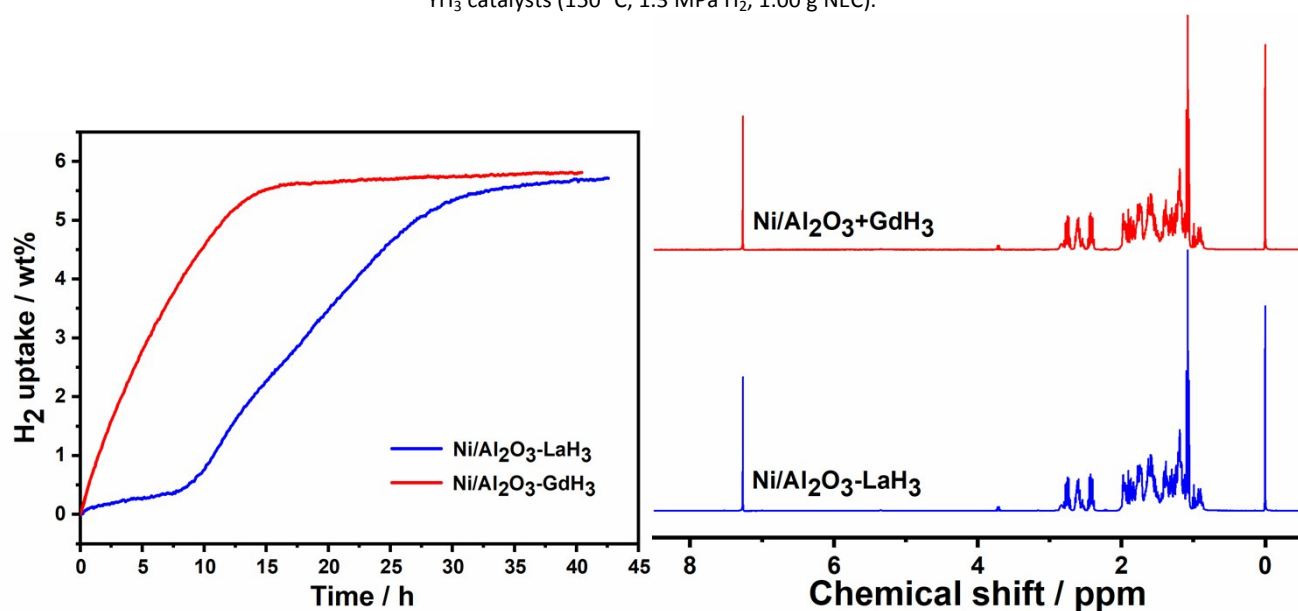

**Fig. S10** Hydrogen absorption kinetics (left) and <sup>1</sup>H NMR spectra of the hydrogenated products (in CDCl<sub>3</sub>) (right) on Ni/Al<sub>2</sub>O<sub>3</sub>-MH catalysts (150 °C, 3 MPa H<sub>2</sub>, 1.00 g NEC).

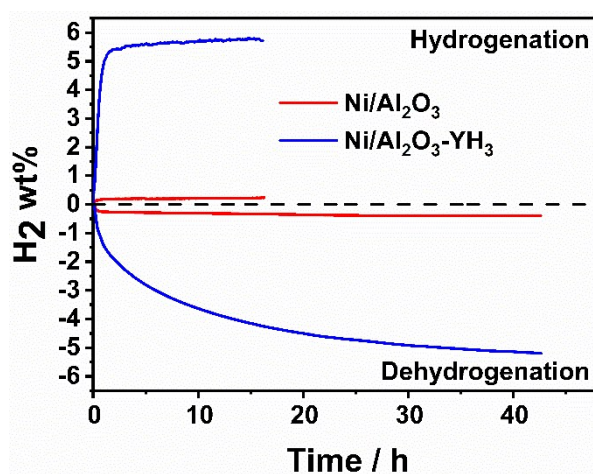

**Fig. S11** Hydrogen absorption and desorption kinetics of NEC on Ni/Al<sub>2</sub>O<sub>3</sub> and Ni/Al<sub>2</sub>O<sub>3</sub>-YH<sub>3</sub> catalysts (1.00 g NEC, 25 mg Ni/Al<sub>2</sub>O<sub>3</sub>, 100 mg YH<sub>3</sub>; 180 °C, 10 MPa H<sub>2</sub> for absorption and 200 °C, 0.1 MPa H<sub>2</sub> for desorption).

## Supplementary Table.

**Table S1.** Catalytic hydrogen absorption performance of NEC using Ni based catalysts.

| Catalysts                                           | Ni loading | Condition                     | Catalyst/NEC mass ratio | Ni/NEC mass ratio       | Time / h | Yield / % | Rates / wt% H <sub>2</sub> h <sup>-1</sup> (mg metal) <sup>-1</sup> | References    |
|-----------------------------------------------------|------------|-------------------------------|-------------------------|-------------------------|----------|-----------|---------------------------------------------------------------------|---------------|
| Ni/Al <sub>2</sub> O <sub>3</sub>                   | 20 wt%     | 200 °C, 6 MPa H <sub>2</sub>  | 0.15                    | 0.03                    | 6.4      | 91.2      | 0.48                                                                | <sup>18</sup> |
| Ni/SiO <sub>2</sub> -Al <sub>2</sub> O <sub>3</sub> | 65 wt%     | 130 °C, 7 MPa H <sub>2</sub>  | 0.20                    | 0.13                    | 7.0      | 50        | 0.21                                                                | <sup>14</sup> |
| Raney-Ni                                            | 100 wt%    | 180 °C, 5 MPa H <sub>2</sub>  | 0.10                    | 0.10                    | 1.3      | 86.2      | 0.66                                                                | <sup>17</sup> |
| Ni/Al <sub>2</sub> O <sub>3</sub> -YH <sub>3</sub>  | 1 wt%      | 150 °C, 3 MPa H <sub>2</sub>  | 0.125                   | 1.25 x 10 <sup>-3</sup> | 5.6      | 100       | 14.3                                                                | This work     |
| Ni/Al <sub>2</sub> O <sub>3</sub> -YH <sub>3</sub>  | 1 wt%      | 180 °C, 10 MPa H <sub>2</sub> | 0.125                   | 1.25 x 10 <sup>-3</sup> | 1.5      | 100       | 53.3                                                                | This work     |
| Ni/Al <sub>2</sub> O <sub>3</sub> -YH <sub>3</sub>  | 1 wt%      | 165 °C, 10 MPa H <sub>2</sub> | 0.125                   | 1.25 x 10 <sup>-3</sup> | 4.0      | 100       | 20.0                                                                | This work     |
| Ni/Al <sub>2</sub> O <sub>3</sub> -YH <sub>3</sub>  | 1 wt%      | 135 °C, 10 MPa H <sub>2</sub> | 0.125                   | 1.25 x 10 <sup>-3</sup> | 8.0      | 100       | 10.0                                                                | This work     |
